# Supplementary material
Source: PubMed Central journal article supplement (PMC6935268)
Supplement: NIHMS1063257-supplement-supplemental_information.pdf [file NIHMS1063257-supplement-supplemental_information.pdf]

Immunity, Volume 51

## Supplemental Information

### **PD-L1:CD80 *Cis*-Heterodimer Triggers the Co-stimulatory Receptor CD28 While Repressing the Inhibitory PD-1 and CTLA-4 Pathways**

**Yunlong Zhao, Calvin K. Lee, Chia-Hao Lin, Rodrigo B. Gassen, Xiaozheng Xu, Zhe Huang, Changchun Xiao, Cristina Bonorino, Li-Fan Lu, Jack D. Bui, and Enfu Hui**

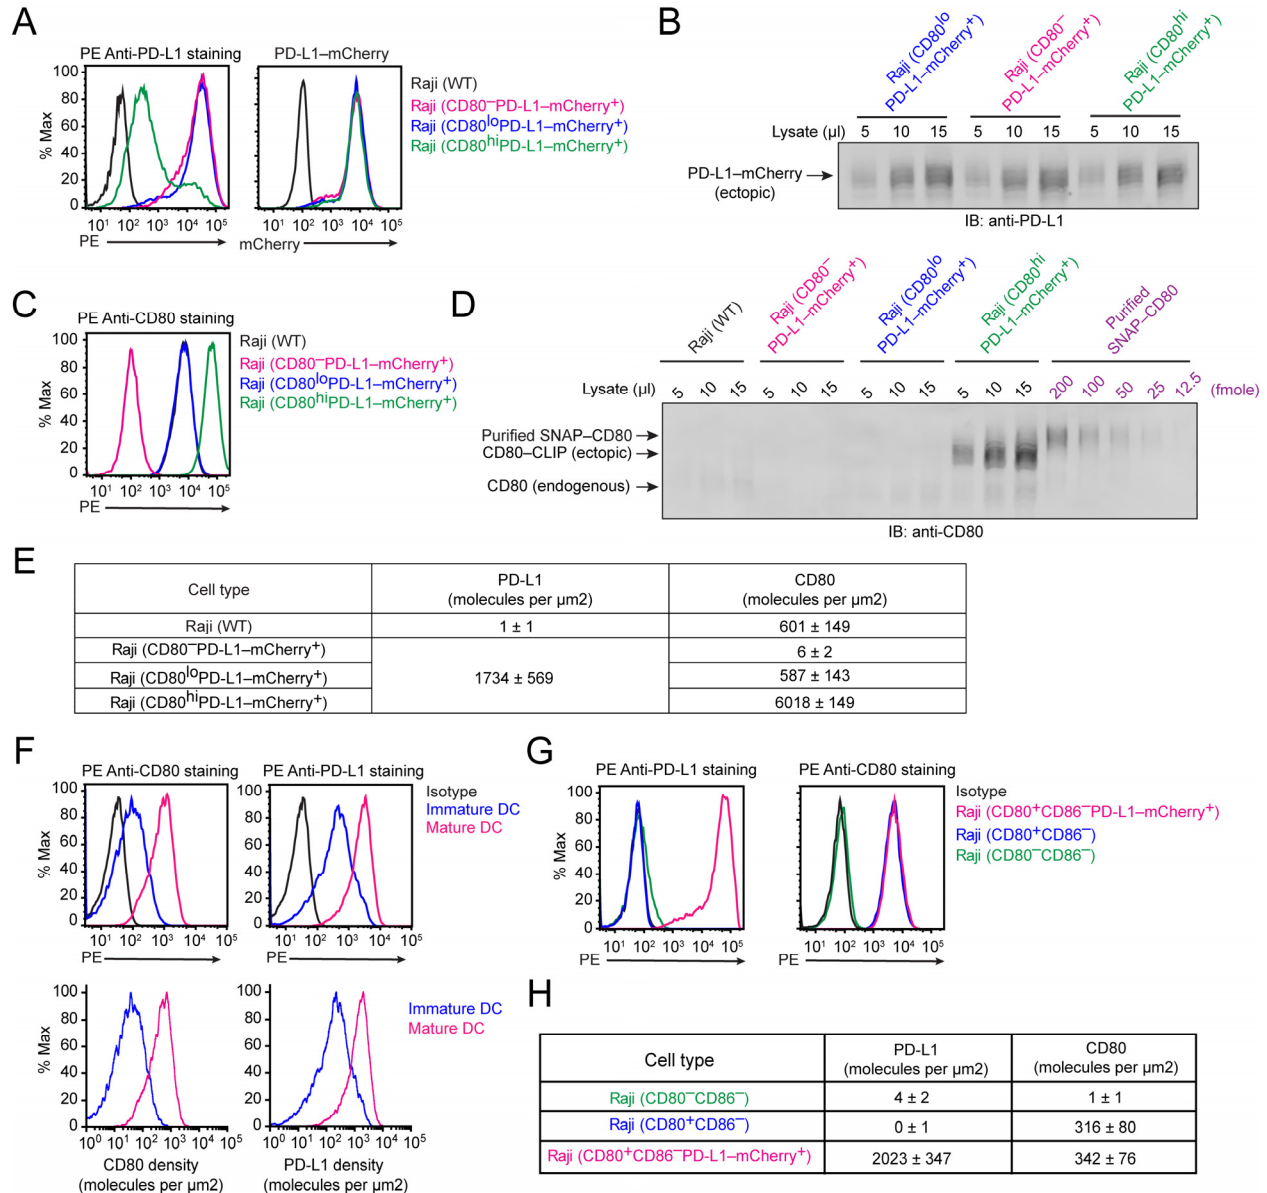

**Figure S1. Quantification of PD-L1 and CD80 Levels on Raji Cell Lines and Human DCs. Related to Figures 2, 3 & 4.**

(A) Shown on the left are flow cytometry histograms of PE signals of the indicated cell lines (used in Figure 2) stained with PE anti-PD-L1 (eBioscience, 14-5983-82). Shown on the right are flow cytometry histograms of mCherry signals for the same set of cell lines. The overlaid histograms of 3 types of PD-L1-mCherry<sup>+</sup> cells indicate that they expressed nearly identical levels of PD-L1-mCherry.

(B) Anti-PD-L1 (eBioscience, 14-5983-82) immunoblot (IB) of the lysates of the indicated cell lines (used in Figure 2). The similar intensities of bands of 3 types of PD-L1-mCherry<sup>+</sup> cells confirmed the mCherry flow cytometry result in panel A that 3 types of cell lines expressed similar levels of PD-L1-mCherry. Please note that PD-L1:CD80 *cis*-complexes were disrupted by SDS sample buffer at 95 °C prior to the SDS-PAGE.

(C) Flow cytometry histograms of PE signals of the indicated cell lines (used in Figure 2) stained with PE anti-CD80 (Biolegend, 305208), showing distinct CD80 expression levels.

**(D)** Anti-CD80 (Novus Biologicals, NBP2-25255) IB of the lysates of indicated cell lines (used in Figure 2), together with decreasing amounts of purified SNAP-CD80, from which a standard curve can be generated to calculate the CD80 levels in each cell line.

**(E)** Table summarizing the PD-L1 and CD80 expression levels for the indicated cell lines (used in Figure 2). Number of PD-L1 molecules per cell were determined based on the PE anti-PD-L1 staining signal of Raji (CD80<sup>-</sup>PD-L1-mCherry+) cells, using the QUANTUM™ R-PE MESF kit, and the PD-L1 density (molecules per  $\mu\text{m}^2$ ) further calculated as described in STAR Methods. The lack of CD80 expression ensured that PE anti-PD-L1 bound to PD-L1 with no interference from *cis*-CD80. This PD-L1 density, determined using the CD80<sup>-</sup> cells, was also assigned to Raji (CD80<sup>lo</sup>PD-L1-mCherry+) cells and Raji (CD80<sup>hi</sup>PD-L1-mCherry+) cells, because 3 types of PD-L1-mCherry+ cells expressed similar levels of PD-L1-mCherry, based on data in panels A and B. Data are presented as mean  $\pm$  SD, n = 3.

**(F)** Upper: Flow cytometry histograms of PE signals on immature or mature human DCs stained with either PE anti-CD80 (Biolegend, 305208) or PE anti-PD-L1 (eBioscience, 14-5983-82). The black histograms correspond to signals of isotype control under each condition. Lower: Histograms of CD80 and PD-L1 surface densities on immature and mature DCs calculated from the flow cytometry histograms, using the QUANTUM™ R-PE MESF kit, as described in STAR Methods.

**(G)** Flow cytometry histograms of PE signals of the indicated Raji cells (used in Figures 3 and 4) stained with PE anti-PD-L1 (Left, eBioscience, 14-5983-82) and PE anti-CD80 (Right, Biolegend, 305208).

**(H)** Table summarizing the PD-L1 and CD80 expression levels for the indicated cell lines (used in Figures 3 and 4). PD-L1 and CD80 levels were calculated based on PE signals in **(A)** and **(C)** using the QUANTUM™ R-PE MESF kit (Bangs Laboratories Inc, 827). Data are presented as mean  $\pm$  SD, n = 3.

**A**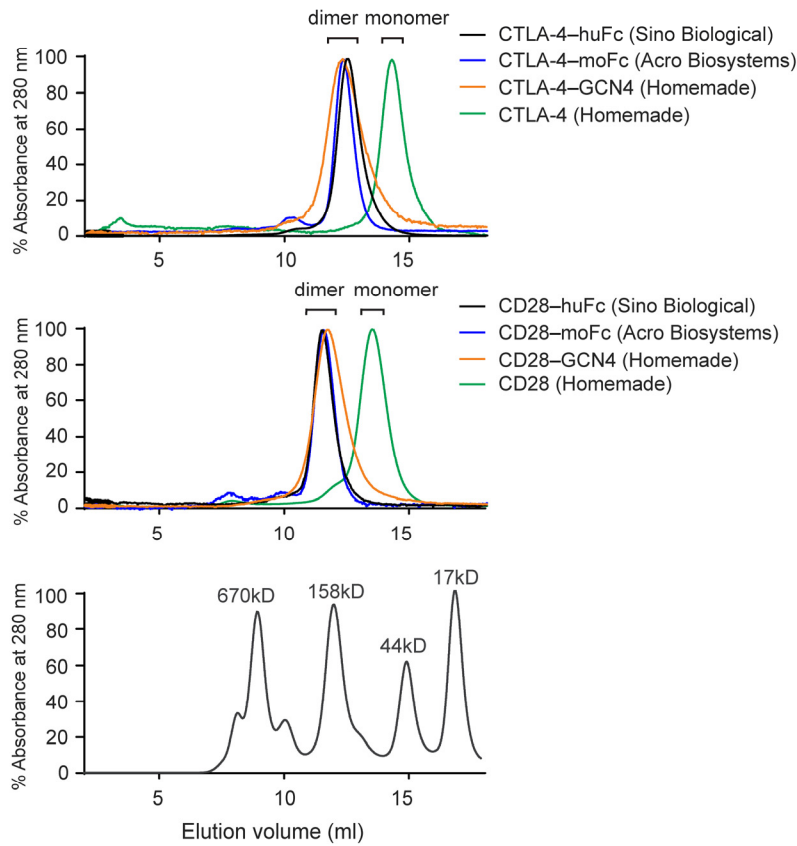**B**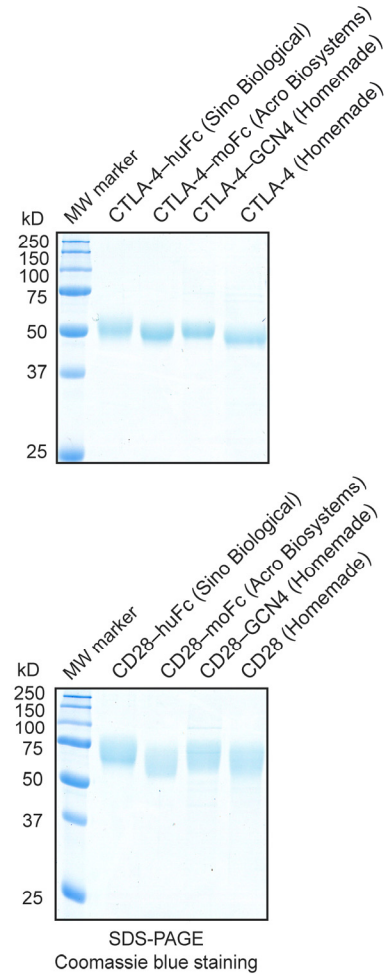

**Figure S2 Dimerization States of Soluble Human CTLA-4 and CD28 Proteins Used in This Study. Related to Figures 3 & 4.**

**(A)** Representative size exclusion chromatograms of indicated CTLA-4 proteins (top), CD28 proteins (middle) and protein standards with their molecular weights (MW) indicated in kilo Delton (kD) (bottom). All chromatograms were obtained using a Superdex 200 increase 10/300 column in an AKTA Pure 25L system. CTLA-4–huFc and CD28–huFc proteins obtained from Sino Biological were pre-cleaned by gel filtration chromatography to remove aggregates.

**(B)** Representative Coomassie blue stained SDS-PAGE of the indicated proteins.

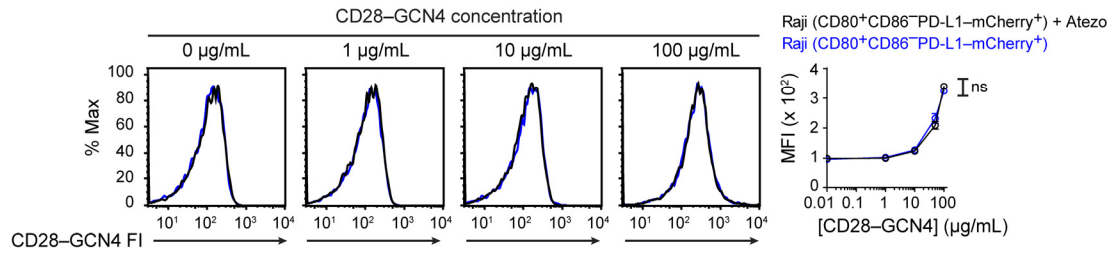

**Figure S3 Atezolizumab Does Not Affect CD28–GCN4 Staining of CD80 and PD-L1 Double Positive Cells. Related to Figure 4.**

Shown on the left are flow cytometry histograms of CD28–GCN4\*SC647 staining of Raji (CD80<sup>+</sup>CD86<sup>-</sup>PD-L1–mCherry<sup>+</sup>) cells with or without atezolizumab (Atezo). Shown on the right is the MFI of SC647 plotted against the input concentration at the indicated conditions (means ± SEM, n = 4). Unpaired two-tailed *Student's t* test: ns, p > 0.05.

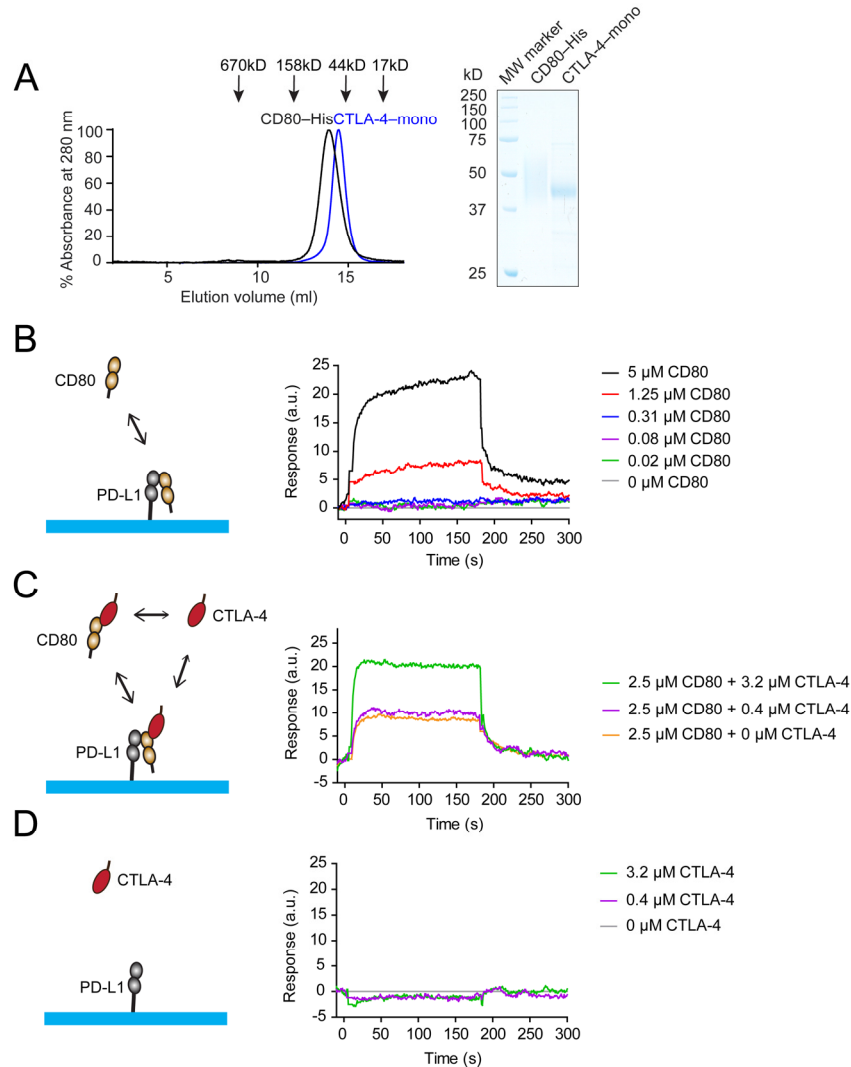

**Figure S4 PD-L1 and CTLA-4 Can Simultaneously Bind to Monomeric CD80. Related to Figure 4.**

**(A)** Gel filtration and SDS-PAGE characterization of soluble CTLA-4 monomer and CD80-His monomer used in the SPR assay. Left: gel filtration profiles of CTLA-4 monomer and CD80-His monomer obtained using a Superdex 200 increase 10/300 column. Arrows indicate elution volumes of protein standards. Right: Coomassie blue stained SDS-PAGE of CD80-His monomer and CTLA-4 monomer.

**(B)** An SPR assay for the interaction between CD80-His monomer in solution and PD-L1 attached to a chip. Shown on the right are the corresponding sensorgrams for the indicated CD80-His concentrations.

**(C)** An SPR assay for measuring the binding of CD80-His monomer and CTLA-4 monomer to a PD-L1 coated chip. Shown on the right are sensorgrams for the indicated CD80:CTLA-4 combinations.

**(D)** An SPR assay for the potential binding of CTLA-4 monomer to a PD-L1 coated chip. Shown on the right are sensorgrams at the indicated CTLA-4 concentrations.

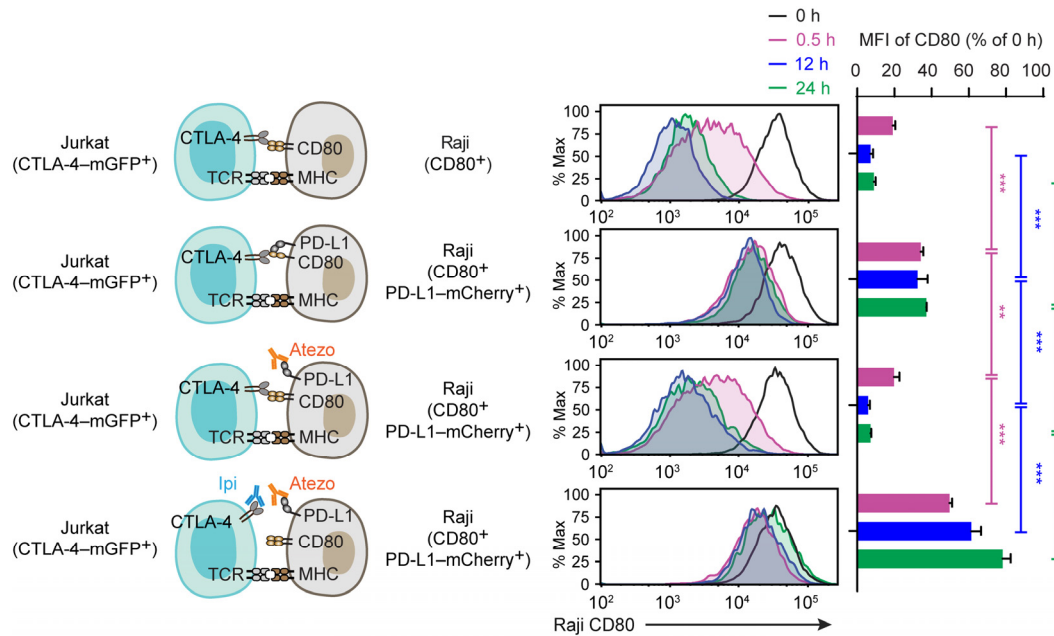

**Figure S5 *Cis*-PD-L1 Persistently Protects CD80 from CTLA-4 Mediated Depletion. Related to Figure 5.**

Shown on the left are cartoons depicting 4 types of co-cultured systems: (1<sup>st</sup> row) Jurkat (CTLA-4-mGFP<sup>+</sup>) cells co-cultured with WT Raji (CD80<sup>+</sup>) cells expressing CD80 but not PD-L1; (2<sup>nd</sup> row): Jurkat (CTLA-4-mGFP<sup>+</sup>) cells co-cultured with Raji cells co-expressing CD80 and PD-L1-mCherry; (3<sup>rd</sup> row): Jurkat (CTLA-4-mGFP<sup>+</sup>) cells co-cultured with Raji cells co-expressing CD80 and PD-L1-mCherry but with the PD-L1 blocked by atezolizumab (Atezo); (4<sup>th</sup> row): Jurkat (CTLA-4-mGFP<sup>+</sup>) cells co-cultured with Raji cells co-expressing CD80 and PD-L1-mCherry but with PD-L1 blocked by atezolizumab (Atezo), and CTLA-4 blocked by ipilimumab (Ipi). Shown in the middle are flow cytometry histograms of CD80 surface levels (probed by allophycocyanin anti-CD80) on Raji cells after indicated durations of co-culturing. Shown on the right are CD80 MFI on Raji cells at the indicated time points, normalized to the CD80 MFI at time zero. Data are presented as mean  $\pm$  SEM from 5 independent replicates.

Unpaired two-tailed *Student's t* test: \* $p < 0.05$ , \*\* $p < 0.01$ , \*\*\* $p < 0.001$ . See Table S3 for genotypes of cells related to this figure.

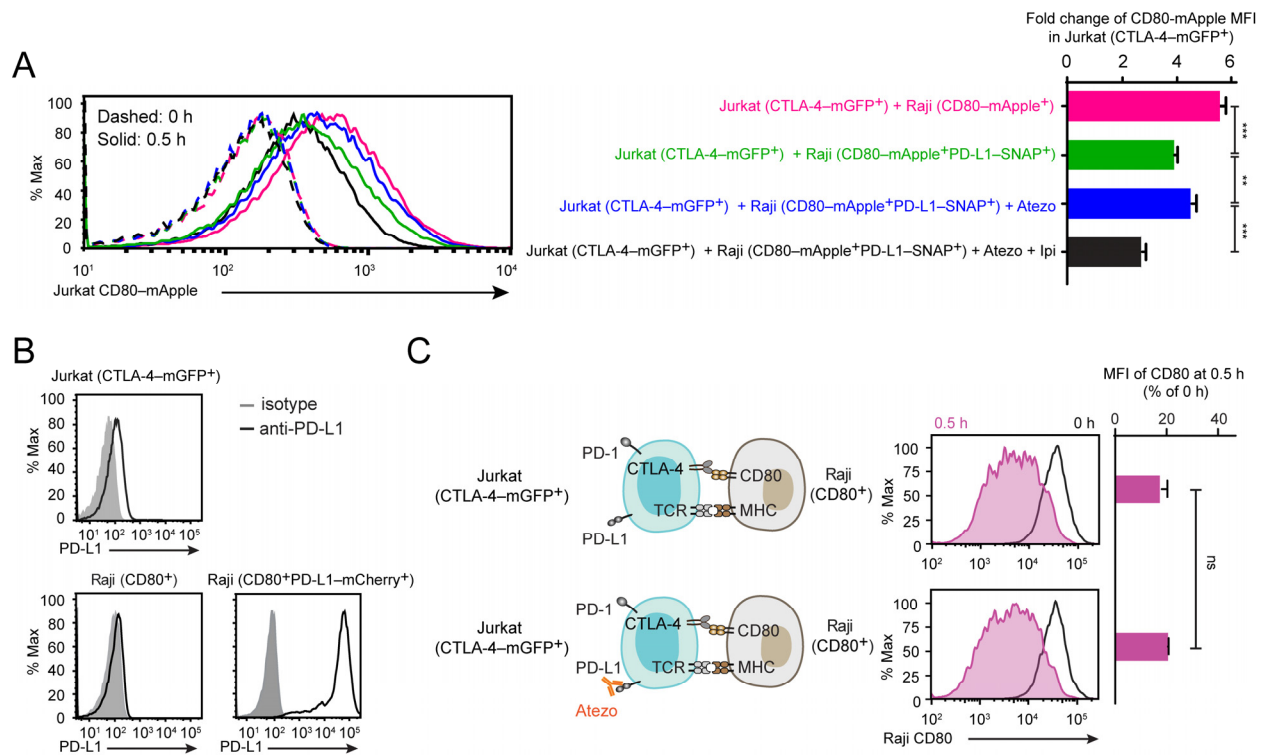

**Figure S6. PD-L1 Inhibits the Ability of CTLA-4<sup>+</sup> Jurkat Cells to Acquire CD80 from Raji APCs. Atezolizumab Mediated CD80 Depletion Does Not Depend on Jurkat-Intrinsic PD-L1. Related to Figure 5.**

**(A)** Shown on the left are raw flow cytometry histograms showing the CD80-mApple fluorescence in Jurkat (CTLA-4-mGFP<sup>+</sup>) cells. *Trans*-endocytosis assay was done as in Figure 5B except measuring CD80-mApple signal in Jurkat cells rather than Raji cells. Shown on the right is a quantification bar graph, with identical color coding to the histograms on the left. CD80-mApple MFI in Jurkat (CTLA-4-mGFP<sup>+</sup>) cells at 0.5 h was divided by the MFI at 0 h to calculate the fold change. Data are shown as mean  $\pm$  SEM from 4 independent replicates.

**(B)** Flow cytometry histograms showing low levels of PD-L1 expression on Jurkat (CTLA-4-mGFP<sup>+</sup>), WT Raji (CD80<sup>+</sup>), and Raji (CD80<sup>+</sup>PD-L1-mCherry<sup>+</sup>) cells.

**(C)** A *trans*-endocytosis assay using WT Raji (CD80<sup>+</sup>) cells lacking PD-L1 and Jurkat (CTLA-4-mGFP<sup>+</sup>) cells. Because the lack of PD-L1 on WT Raji (CD80<sup>+</sup>) cells, atezolizumab treatment would block the PD-L1 on Jurkat cells. Shown on the right is a flow cytometry histogram showing CD80 expression level on the Raji cells, +/-atezolizumab (Atezo), at indicated time points. Bar graph showing CD80 MFI on Raji at 0.5 h, normalized to CD80 MFI at 0 h (mean  $\pm$  SEM, n = 5).

Unpaired two-tailed *Student's t* test: \*p < 0.05, \*\*p < 0.01, \*\*\*p < 0.001. See Table S3 for genotypes of cells related to this figure.



**Table S1 List of oligos. Related to STAR Methods.**

| Name    | Sequence                                                  | Note                                                                                           |
|---------|-----------------------------------------------------------|------------------------------------------------------------------------------------------------|
| EH-98   | ccttccatgggtctttctgcag atggacgctatgaagagag                | clone signal peptide of HIV envelope glycoprotein into pPPI4, pair with EH-99                  |
| EH-99   | ggtggctccatcgaatctagcatggat                               | clone signal peptide of HIV envelope glycoprotein into pPPI4, pair with EH-98                  |
| EH-100  | tagatccgatggagccaccgcagttc                                | clone Strep-SNAP tag into pPPI4, pair with EH-101                                              |
| EH-101  | gtgatggaattcagattggaatcggacagtctcctaccgctaccgctacctc      | clone Strep-SNAP tag into pPPI4, pair with EH-100                                              |
| EH-102  | ttccaatcgaattccatcaccatcaccatcaccatcaccatcactgagcggc      | clone His <sub>10</sub> tag into pPPI4, pair with EH-103                                       |
| EH-103  | agctctagatgcatgctcgcagcggccgctcagtgatgggtgatg             | clone His <sub>10</sub> tag into pPPI4, pair with EH-102                                       |
| EH-104  | gactgtccgattccaatctggcgttaccacgtgaccaag                   | clone CD80 extracellular domain CDS into pPPI4, pair with EH-105                               |
| EH-105  | gtgatggtgatggatggccgttatcaggaaaatgctc                     | clone CD80 extracellular domain CDS into pPPI4, pair with EH-104                               |
| EH-1069 | ctctagatgcatgctcgcagctcagttacaggaaaatgctcttg              | clone CD80 extracellular domain CDS without His <sub>10</sub> tag into pPPI4, pair with EH-104 |
| EH-1081 | gaaccggaccgcttgatatacctaataacctc                          | clone CD80 with I92R mutation into pPPI4 or pHR, pair with EH-105 or EH439                     |
| EH-1082 | tgatcaaaagcgggtccggttctgtactc                             | clone CD80 with I92R mutation into pPPI4 or pHR, pair with EH-104 or EH438                     |
| EH-112  | gactgtccgattccaatctggcttattcacagtgcagctc                  | clone PD-L2 extracellular domain CDS into pPPI4, pair with EH-113                              |
| EH-113  | gtgatggtgatggatggccctgatgggtcctgggttc                     | clone PD-L2 extracellular domain CDS into pPPI4, pair with EH-112                              |
| EH-489  | gactgtccgattccaatctgaattcgggttctgggttctatg                | clone GCN4–His6 extracellular domain into pPPI4, pair with EH-490                              |
| EH-490  | tcagtgatggtgatggatgctctcgcaccacaagct                      | clone GCN4–His6 extracellular domain into pPPI4, pair with EH-489                              |
| EH-491  | ctctagatgcatgctcgcagcggccgctcagtgatggatggatgctc           | clone GCN4–His6 extracellular domain into pPPI4, pair with EH-489                              |
| EH-493  | gactgtccgattccaatctgaaaacaagattttggaagcagtc               | clone CD28 extracellular domain CDS into pPPI4-GCN4–His <sub>6</sub> , pair with EH-494        |
| EH-494  | tagaaccaccagaaccaccgaaggcttagaaggctccgggaa                | clone CD28 extracellular domain CDS into pPPI4-GCN4–His <sub>6</sub> , pair with EH-493        |
| EH-495  | gactgtccgattccaatctgaaaagcaatgcacgtggcccag                | clone CTLA-4 extracellular domain CDS into pPPI4-GCN4–His <sub>6</sub> , pair with EH-496      |
| EH-496  | tagaaccaccagaaccaccgaagtcagaatctgggcacggt                 | clone CTLA-4 extracellular domain CDS into pPPI4-GCN4–His <sub>6</sub> , pair with EH-495      |
| EH-676  | tagatgcatgctcgcagctcagtgatggatggatggccgggcttagaaggtccggga | clone CD28–His <sub>6</sub> extracellular domain CDS into pPPI4, pair with EH-493              |
| EH-677  | ctagatgcatgctcgcagctcagtgatggatggatggccgtcagaatctggcac    | clone CTLA-4–His <sub>6</sub> extracellular domain CDS into pPPI4, pair with EH-495            |
| EH-1431 | atttcgcaatctttgtccattcggaaatctagcatggatttc                | clone signal peptide of HIV envelope glycoprotein fused with SNAP into pPPI4, pair with EH-98  |
| EH-433  | atggacaaagattgcgaaatgaac                                  | clone SNAP–CTLA-4 into pPPI4, pair with EH-103                                                 |
| EH-460  | tggagctctcgagaattctcatgatcttctcctgctaattg                 | clone PD-L2 signal peptide into pHR, pair with EH-461                                          |
| EH-461  | atttcgagctctttgtccatagctctatctggtgaagc                    | clone PD-L2 signal peptide into pHR, pair with EH-460                                          |
| EH-428  | atggacaaagactgcgaaatg                                     | clone CLIP tag into pHR, pair with EH-429                                                      |

|        |                                                  |                                                                                                      |
|--------|--------------------------------------------------|------------------------------------------------------------------------------------------------------|
| EH-429 | cacctccaccgctaccgctaccgctaccacccagcccaggcttgc    | clone CLIP tag into pHR, pair with EH-428                                                            |
| EH-462 | tagcggtagcgggtggaggtggaagcagcttattcacagtgcagctcc | clone PD-L2 without signal peptide into pHR, pair with EH-463                                        |
| EH-463 | gtcgacttagagtcgcttagatagcactgttcacttcc           | clone PD-L2 without signal peptide into pHR, pair with EH-462                                        |
| EH-398 | ggagctctcgagaattctcatgggccacacacggaggc           | clone CD80 signal peptide into pHR, pair with EH-437; clone CD80 CDS into pHR-mGFP, pair with EH-688 |
| EH-437 | atttcgcaatcttgcatacctgaacagaagtgagaaag           | clone CD80 signal peptide into pHR, pair with EH-398                                                 |
| EH-433 | atggacaagattgcgaaatgaaac                         | clone SNAP tag into pHR, pair with EH-434                                                            |
| EH-434 | cacctccaccgctaccgctaccgctaccctccagacccggttacc    | clone SNAP tag into pHR, pair with EH-433                                                            |
| EH-438 | tagcggtagcgggtggaggtggaagcagcgttaccagtgaccaagg   | clone CD80 or CD80 (I92R) without signal peptide into pHR, pair with EH-439 or EH-1082               |
| EH-439 | caggctgactctagagtcgcttatacagggcgctacatttcc       | clone CD80 or CD80 (I92R) without signal peptide into pHR, pair with EH-438 or EH-1081               |
| EH-410 | caccggaaattgaggtatggacact                        | synthesis DNA sequence of CD80 sgRNA to generate pX330GFP-CD80_1, pair with EH-411                   |
| EH-411 | aaacagtgtccatacctcaatttc                         | synthesis DNA sequence of CD80 sgRNA to generate pX330GFP-CD80_1, pair with EH-410                   |
| EH-412 | caccggcccatggctcagatgctt                         | synthesis DNA sequence of CD80 sgRNA to generate pX330GFP-CD80_2, pair with EH-413                   |
| EH-413 | aaacaagcatctgaagccatgggc                         | synthesis DNA sequence of CD80 sgRNA to generate pX330GFP-CD80_2, pair with EH-412                   |
| EH-563 | caccggagtaacattcttctgtga                         | synthesis DNA sequence of CD80 sgRNA to generate pX330GFP-CD86_1, pair with EH-564                   |
| EH-564 | aaactcacaagagaatgttactc                          | synthesis DNA sequence of CD80 sgRNA to generate pX330GFP-CD86_1, pair with EH-563                   |
| EH-565 | caccgggtgatggccttctctctc                         | synthesis DNA sequence of CD80 sgRNA to generate pX330GFP-CD86_2, pair with EH-566                   |
| EH-566 | aaacgagagcaggaaggccatcac                         | synthesis DNA sequence of CD80 sgRNA to generate pX330GFP-CD86_2, pair with EH-565                   |
| EH-688 | cgcaagcttgatatcctgcagacgtacagggcgctacatttc       | clone CD80 into pHR-mGFP, pair with EH-398                                                           |
| EH-747 | cttgcggtaccgcccggggatccaatggacaagactgcgaaatg     | clone CLIP to replace mGFP in pHR-CD80-mGFP, pair with EH-748                                        |
| EH-748 | caggctgactctagagtcgcccggccttaaccagcccaggcttgc    | clone CLIP to replace mGFP in pHR-CD80-mGFP, pair with EH-747                                        |
| EH-59  | ggagctctcgagaattctcacgatgctcaggctgctctggc        | clone CD28 into pHR-mCherry, pair with EH-60                                                         |
| EH-60  | caagcttgatatcctgcagacgggagcgataggctgcgaagt       | clone CD28 into pHR-mCherry, pair with EH-59                                                         |
| EH-751 | tttttgaggcctaggctgaattctcatgggccacacacggaggc     | clone CD80 to replace PD-1 in pHR-dSV40-PD-1-mGFP (Zhao et al., 2018), pair with EH-688              |
| EH-68  | ctctcgagaattctcaccatggctgccttgatttc              | clone CTLA-4 fused with mGFP into pHR-dSV40, pair with EH-690                                        |
| EH-690 | tggtggcgaccggtggatcacgattgatgggaataaaataaggc     | clone CTLA-4 fused with mGFP into pHR-dSV40, pair with EH-68                                         |
| EH-749 | cgatgatccaccggtgccaccatggtgagcaagggcgag          | clone mGFP fused with CTLA-4 into pHR-dSV40, pair with EH-73                                         |
| EH-73  | aggtcgactctagagtcgcccggcct                       | clone mGFP fused with CTLA-4 into pHR-dSV40, pair with EH-749                                        |

**Table S2 List of Recombinant DNAs. Related to STAR Methods.**

| <b>DNA</b>                                     | <b>SOURCE</b>     | <b>IDENTIFIER</b> |
|------------------------------------------------|-------------------|-------------------|
| pPPI4                                          | Lee et al., 2015  | N/A               |
| pPPI4-Strep-SNAP-PD-L1-His <sub>10</sub>       | Zhao et al., 2018 | N/A               |
| pPPI4-Strep-SNAP-PD-L2-His <sub>10</sub>       | This study        | N/A               |
| pPPI4-Strep-SNAP-CD80-His <sub>10</sub>        | This study        | N/A               |
| pPPI4-Strep-SNAP-CD80 (I92R)-His <sub>10</sub> | This study        | N/A               |
| pPPI4-Strep-SNAP-CD80                          | This study        | N/A               |
| pPPI4-Strep-SNAP-CTLA-4-GCN4-His <sub>6</sub>  | This study        | N/A               |
| pPPI4-Strep-SNAP-CTLA-4-His <sub>6</sub>       | This study        | N/A               |
| pPPI4-SNAP-CTLA-4-His <sub>6</sub>             | This study        | N/A               |
| pPPI4-Strep-SNAP-CD28-GCN4-His <sub>6</sub>    | This study        | N/A               |
| pPPI4-Strep-SNAP-CD28-His <sub>6</sub>         | This study        | N/A               |
| pHR-CLIP-PD-L1                                 | Zhao et al., 2018 | N/A               |
| pHR-CLIP-PD-L2                                 | This study        | N/A               |
| pHR-SNAP-CD80                                  | This study        | N/A               |
| pHR-SNAP-CD80 (I92R)                           | This study        | N/A               |
| pHR-SNAP-CD86                                  | Zhao et al., 2018 | N/A               |
| pX330GFP-CD80_1                                | This study        | N/A               |
| pX330GFP-CD80_2                                | This study        | N/A               |
| pX330GFP-CD86_1                                | This study        | N/A               |
| pX330GFP-CD86_2                                | This study        | N/A               |
| pMD2.G                                         | Addgene           | 12259             |
| psPAX2                                         | Addgene           | 12260             |
| pHR-PD-1-mGFP                                  | Hui et al., 2017  | N/A               |
| pHR-PD-L1-mCherry                              | Hui et al., 2017  | N/A               |
| pHR-PD-L1-SNAP                                 | Zhao et al., 2018 | N/A               |
| pHR-CD80-CLIP                                  | This study        | N/A               |
| pHR-CD80-mGFP                                  | This study        | N/A               |
| pHR-dSV40-CD80-mGFP                            | This study        | N/A               |
| pHR-CD28-mCherry                               | This study        | N/A               |
| pHR-dSV40-CTLA-4-mGFP                          | This study        | N/A               |
| pHR-dSV40-CD80-mApple                          | This study        | N/A               |

**Table S3 List of cell lines genotype. Related to STAR Methods.**

| Cell line                                                                   | Genotype                                                                                                              | Figures related      |
|-----------------------------------------------------------------------------|-----------------------------------------------------------------------------------------------------------------------|----------------------|
| Jurkat (WT)                                                                 | <i>CD28</i> <sup>+/+</sup>                                                                                            | Figure 5             |
| Jurkat (PD-1-mGFP <sup>+</sup> )                                            | <i>CD28</i> <sup>+/+</sup> <i>PD-1-mGFP</i> <sup>+</sup>                                                              | Figure 2             |
| Jurkat (CD28-mCherry <sup>+</sup> )                                         | <i>CD28</i> <sup>+/+</sup> <i>CD28-mCherry</i> <sup>+</sup>                                                           | Figure 3             |
| Jurkat (CD28 <sup>-</sup> )                                                 | <i>CD28</i> <sup>-/-</sup>                                                                                            | Figure 3             |
| Jurkat (CTLA-4-mGFP <sup>+</sup> )                                          | <i>CTLA-4-mGFP</i> <sup>+</sup>                                                                                       | Figures 5, S5, S6    |
| Raji (WT)                                                                   | <i>CD80</i> <sup>+/+</sup> <i>CD86</i> <sup>+/+</sup>                                                                 | Figure S1            |
| Raji (CD80 <sup>+</sup> )                                                   | <i>CD80</i> <sup>+/+</sup> <i>CD86</i> <sup>+/+</sup>                                                                 | Figures 5, S5, S6    |
| Raji (CD80-PD-L1-mCherry <sup>+</sup> )                                     | <i>CD80</i> <sup>-/-</sup> <i>CD86</i> <sup>+/+</sup> <i>PD-L1-mCherry</i> <sup>+</sup>                               | Figures 2, S1        |
| Raji (CD80 <sup>lo</sup> PD-L1-mCherry <sup>+</sup> )                       | <i>CD80</i> <sup>+/+</sup> <i>CD86</i> <sup>+/+</sup> <i>PD-L1-mCherry</i> <sup>+</sup>                               | Figures 2, S1        |
| Raji (CD80 <sup>hi</sup> PD-L1-mCherry <sup>+</sup> )                       | <i>CD80</i> <sup>+/+</sup> <i>CD86</i> <sup>+/+</sup> <i>CD80-CLIP</i> <sup>+</sup> <i>PD-L1-mCherry</i> <sup>+</sup> | Figures 2, S1        |
| Raji (CD80-mGFP <sup>+</sup> CD86 <sup>+</sup> )                            | <i>CD80</i> <sup>-/-</sup> <i>CD86</i> <sup>+/+</sup> <i>CD80-mGFP</i> <sup>+</sup>                                   | Figure 3             |
| Raji (CD80-mGFP <sup>+</sup> CD86 <sup>+</sup> CLIP-PD-L1 <sup>+</sup> )    | <i>CD80</i> <sup>-/-</sup> <i>CD86</i> <sup>+/+</sup> <i>CD80-mGFP</i> <sup>+</sup> <i>CLIP-PD-L1</i> <sup>+</sup>    | Figure 3             |
| Raji (CD86 <sup>+</sup> CLIP-PD-L1 <sup>+</sup> )                           | <i>CD80</i> <sup>-/-</sup> <i>CD86</i> <sup>+/+</sup> <i>CLIP-PD-L1</i> <sup>+</sup>                                  | Figure 3             |
| Raji (CD80-CD86 <sup>+</sup> )                                              | <i>CD80</i> <sup>-/-</sup> <i>CD86</i> <sup>+/+</sup>                                                                 | Figure 3             |
| Raji (CD80 <sup>+</sup> CD86 <sup>+</sup> )                                 | <i>CD80</i> <sup>+/+</sup> <i>CD86</i> <sup>+/+</sup>                                                                 | Figure 3             |
| Raji (CD80 <sup>+</sup> CD86 <sup>+</sup> PD-L1-mCherry <sup>+</sup> )      | <i>CD80</i> <sup>+/+</sup> <i>CD86</i> <sup>+/+</sup> <i>PD-L1-mCherry</i> <sup>+</sup>                               | Figure 3             |
| Raji (CD80-CD86 <sup>-</sup> )                                              | <i>CD80</i> <sup>-/-</sup> <i>CD86</i> <sup>-/-</sup>                                                                 | Figures 3, 4, S1     |
| Raji (CD80 <sup>+</sup> CD86 <sup>-</sup> )                                 | <i>CD80</i> <sup>+/+</sup> <i>CD86</i> <sup>-/-</sup>                                                                 | Figures 3, 4, S1     |
| Raji (CD80 <sup>+</sup> CD86 <sup>-</sup> PD-L1-mCherry <sup>+</sup> )      | <i>CD80</i> <sup>+/+</sup> <i>CD86</i> <sup>-/-</sup> <i>PD-L1-mCherry</i> <sup>+</sup>                               | Figures 3, 4, S1, S3 |
| Raji (CD80-mGFP <sup>+</sup> CD86 <sup>-</sup> PD-L1-mCherry <sup>+</sup> ) | <i>CD80</i> <sup>-/-</sup> <i>CD86</i> <sup>-/-</sup> <i>CD80-mGFP</i> <sup>+</sup> <i>PD-L1-mCherry</i> <sup>+</sup> | Figure 4             |
| Raji (CD80-mGFP <sup>+</sup> CD86 <sup>-</sup> )                            | <i>CD80</i> <sup>-/-</sup> <i>CD86</i> <sup>-/-</sup> <i>CD80-mGFP</i> <sup>+</sup>                                   | Figure 4             |
| Raji (CD80-mGFP <sup>+</sup> CD86 <sup>-</sup> PD-L1-SNAP <sup>+</sup> )    | <i>CD80</i> <sup>-/-</sup> <i>CD86</i> <sup>-/-</sup> <i>CD80-mGFP</i> <sup>+</sup> <i>PD-L1-SNAP</i> <sup>+</sup>    | Figure 4             |
| Raji (CD80 <sup>+</sup> PD-L1-mCherry <sup>+</sup> )                        | <i>CD80</i> <sup>+/+</sup> <i>CD86</i> <sup>+/+</sup> <i>PD-L1-mCherry</i> <sup>+</sup>                               | Figures 5, S5, S6    |
| Raji (CD80-mApple <sup>+</sup> )                                            | <i>CD80</i> <sup>-/-</sup> <i>CD86</i> <sup>-/-</sup> <i>CD80-mApple</i> <sup>+</sup>                                 | Figures 5, S6        |
| Raji (CD80-mApple <sup>+</sup> PD-L1-SNAP <sup>+</sup> )                    | <i>CD80</i> <sup>-/-</sup> <i>CD86</i> <sup>-/-</sup> <i>CD80-mApple</i> <sup>+</sup> <i>PD-L1-SNAP</i> <sup>+</sup>  | Figures 5, S6        |
